# Supplementary material
Source: publisher site journal article supplement (https://www.dovepress.com/article/219821)
Supplement: Supplementary file 1 [file get_supplementary_file.php]

**Online supplement**

**Sputum exosomal microRNAs profiling reveals critical pathways modulated by *Pseudomonas aeruginosa* colonization in bronchiectasis**

**Yan Huang 1, M. MSc., Chun-lan Chen 1, Ph.D., Jing-jing Yuan 1 M. MSc., Hui-min Li 1, M.T., Xiao-rong Han 1, M. MSc., Rong-chang Chen 2, M.D., Wei-jie Guan 1, M. D., Nan-shan Zhong 1, M.D.**

1 Department of Respiratory Medicine, State Key Laboratory of Respiratory Disease, National Clinical Research Center for Respiratory Disease, Guangzhou Institute for Respiratory Health, The First Affiliated Hospital of Guangzhou Medical University, Guangzhou, Guangdong, China

2 Department of Respiratory Medicine, Shenzhen People’s Hospital, Shenzhen, Guangdong, China

**Corresponding author 1:** Wei-jie Guan, M. D., State Key Laboratory of Respiratory Disease, National Clinical Research Center for Respiratory Disease, Guangzhou Institute for Respiratory Health, The First Affiliated Hospital of Guangzhou Medical University, Address: 151 Yanjiang Road, Guangzhou, Guangdong, China, Fax: +86-20-83062718, Phone: +86-20-83062876, E-mail: [battery203@163.com](mailto:battery203@163.com)

**Corresponding author 2:** Nan-shan Zhong, M. D., State Key Laboratory of Respiratory Disease, National Clinical Research Center for Respiratory Disease, Guangzhou Institute for Respiratory Health, The First Affiliated Hospital of Guangzhou Medical University, Address: 151 Yanjiang Road, Guangzhou, Guangdong, China, Fax: +86-20-83062719, Phone: +86-20-83062719, E-mail: nanshan@vip.163.com

**Author’s contributions:** All authors contributed to data analysis, drafting and revising the article, gave final approval of the version to be published, and agree to be accountable for all aspects of the work.

**METHODS**

**Definition of bronchiectasis exacerbation**

Bronchiectasis exacerbation was defined as three or more symptoms (i.e., cough, sputum volume/purulence, dyspnea, hemoptysis, fatigue) having significantly deteriorated for >48 hrs that required changes in treatment. This definition is in line with the expert consensus published in *European Respiratory Journal*.

**Sputum sampling schemes**

Induced sputum was performed in healthy subjects only. This was achieved by nebulization with 3% hypertonic saline. Because all eligible bronchiectasis patients could spontaneously produce sputum, we sampled spontaneous sputum only. We strictly controlled the quality of sputum to largely rule out the effects of salivary contamination, which included the removal of saliva as much as possible and the selection of the most purulent sputum for testing. All samples were subject to quality control under the light microscope (eligible samples defined as the epithelial cell count being less than 10 and leukocyte count being greater than 25 under the light microscope at a magnification of 100X)[S1, S2].

**Extraction of sputum exosomes**

Exosomes were isolated from spontaneous sputum in bronchiectasis patients and the induced sputum from healthy subjects. After thawing, approximately four aliquots of phosphate buffer solution were added to achieve complete homogenization, followed by 18,000 g centrifugation for 10 minutes at 4°C (Thermo Scientific, USA), and further filtration through an 0.8 µm filter [S3~5]. The supernatant was used for extraction of exosomes with the exoEasy Maxi Kit (Qiagen Inc., Hilden, Germany) based on manufacturer’s instructions. Exosomes were suspended with buffer XE (Qiagen Inc., Hilden, Germany). For exosomal miRNA sequencing, the total RNA was extracted from the cell pellets using QIAZol lysis reagent (Qiagen Inc., Hilden, Germany) by following the instructions of the manufacturer.

**Transmission electron microscopy**

Transmission electron microscopy (TEM) was performed to confirm the presence of exosomes in sputum samples. Exosomes were suspended in 400 μl buffer XE. 20μl of the suspension was loaded on a copper grid for 2 minutes, and treated with phosphotungstate (3%, pH 7.0) for 2 minutes. The grid was rinsed with sterile water, and subject to removal of the residual liquid by using filter papers. The girds were air dried in room temperature followed by examination with the H-7650 transmission electron microscope (HITACHI Co. Ltd., Tokyo, Japan) at 80 kV.

**Exosomal miRNA isolation and quantification**

The total RNA was extracted by using commercialized exoRNeasy Serum/Plasma Maxi Kit (Qiagen Inc., Hilden, Germany) and stored in the -80℃ freezer until further sequencing. In general, a spin column-based method was applied for the isolation of total RNA from exosomes. After thawing, quantification and integrity of the total RNA as well as the assessment of the distribution of the gene fragments were performed by using RNA Nano 6000 Assay Kit and the Aglient Bioanalyzer 2100 system (Aligent Technologies, CA, USA).

**Library preparation of miRNA**

We employed 3 μg RNA per sample as the input material for construction of the miRNA library which was generated with NEBNext® Multiplex Small RNA Library Prep Set for Illumina® (NEB Inc., USA) by following the manufacturer’s protocol.

Briefly, the NEB 3' & 5' Adaptor were directly and specifically ligated to the 3' and 5' end of the small RNAs (miRNA, siRNA and piRNA), which were also termed the 'SR Adaptor'. After ligation at the 3' end, the reverse transcriptase Primer (RT Primer) was hybridized to the excess of 3' SR adaptor for transformation of the single-stranded DNA adaptor into a double-strand DNA. The first strand cDNA was synthesized by using M-MuLV Reverse Transcriptase (RNase H-). PCR amplification was performed, followed by purification of the PCR products (DNA fragments, length: 140~160 bp) on a 8% polyacrylamide gel (100 V, 80 min). The cDNA library was constructed and its sequence length was examined by using the Aglient Bioanalyzer 2100 system (Aligent Technologies, CA, USA). The samples with an effective concentration being greater than 2nM as quantified with qPCR could be subject to exosomal miRNA sequencing by using Illumina HiSeq 2500 platform.

See a schematic flowchart in **Figure S1**.

**Clustering and sequencing of miRNA**

We collected the quality-controlled sputum samples to complete the following processes. Clustering of the barcoded samples was performed on a cBot Cluster Generation System by using TruSeq SR Cluster Kit v3-cBot-HS (Illumia Inc., USA) according to the manufacturer’s instructions. Following cluster generation, the miRNA library was sequenced on Illumina Hiseq 2500 platform (Illumina Inc., USA) and the 50bp single-end reads were generated.

**Sequencing data analysis**

*Quality control of the miRNA sequence*

Raw reads (in *fastq* format) were initially processed with the *Perl* and *Python* scripts, the clean data were obtained by filtering the reads from the raw data. The reads which contained ploy-N, had 5’ adapter contaminants were removed. None of the clean reads had 3’ adapter or the insert tag, or ploy-A, -T, -G or -C, or low-quality reads. All subsequent analyses were performed with the processed clean data.

*Mapping of genes, miRNA alignment, and tag removal*

The total small RNA tags were mapped to the reference sequence by using *Bowtie* [S6] to analyze for their expression levels and distribution characteristics. The mapped miRNA tags were referenced for the identification of the known miRNA based on the database miRBase 22.0 (ftp://mirbase.org/pub/mirbase/CURRENT/genomes/hsa.gff3). The tags of the different small RNAs were mapped to *RepeatMasker* and *Rfam* database to remove those that were originated from protein-coding genes, repeat sequences, rRNA, tRNA, snRNA and snoRNA.

*Gene annotation*

The following priority rule was applied to ensure that each of the unique small RNA was mapped to only one annotation which the 'known miRNA' would be prioritized. The known RNA was analyzed with miFam.dat (http://www.mirbase.org/ftp.shtml) to determine the family of RNAs that it belonged to. The target genes of the differentially expressed miRNAs (DEMs) were predicted with DIANA-microT web server version 5.0 and validated with DIANA-TarBase version 8.0 database [S7, 8]. The level of miRNAs expression was normalized by the transcript per million (TPM) according to the criteria proposed by Zhou and colleagues [S9].

Differential expression analysis for different subgroups was performed using the *DESeq R* package (1.8.3). The crude P values were adjusted with the Benjamini-Hochberg algorithm, with statistical significance threshold set at 0.05.

*Gene Ontology and Kyoto Encyclopedia of Genes and Genomes*

Gene Ontology enrichment analysis and Kyoto Encyclopedia of Genes and Genomes(KEGG) pathways analysis were performed via *clusterProfiler R* package (www.r-project.com) which compared the biological functions and signaling pathways [S10].

**Least absolute shrinkage and selection operator model analysis**

In order to explore whether multiple miRNAs can improve the discriminative capacity of PA colonization, we performed Least absolute shrinkage and selection operator (LASSO) model, which was used to reduce the dimension to obtain the minimal number of differentially expressed miRNAs. In this model, we followed the recommendation and randomly selected 90% patients to establish the model formula, then verified for 10% of the data.

The model formula was *2.18 + 1.48* × *10-3* × *miR-1273h-5p - 4.04* × *10-4* × *miR-1306-3p-1.08* × *10-3* × *miR-193b-3p + 1.28* ×*10-3*× *miR-548i + 2.69* × *10-3* × *miR-628-5p-7.30* ×*10-5* × *miR-744-5p + 3.04* × *10-5* × *miR-23a-3p*, whose minimum λ was 0.022.

**Quantitative polymerase chain reaction (qPCR) for validation of miRNA assays**

Surplus RNA (derived from the sufficient remaining sputum volume) after sequencing was subject to further validation with qPCR assays (in 34 bronchiectasis patients). The conditions for validation of miRNA expression levels with quantitative reverse transcriptase polymerase chain reaction (RT-qPCR) were as follows: 1) activation of HotStarTaq DNA polymerase at 95 °C for 15 min; 2) 40 cycles of denaturation at 94°C for 15 s, annealing at 55°C for 30 s, and extension at 70°C for 30s. Synthetic *C. elegans* miR-39 mimics (Cat No. 219610, Qiagen Inc.,) served as the reference miRNA. All reactions were run in duplicates. The primers of miR-223-3p: TGTCAGTTTGTCAAATACCCCA; miR-92b-5p: AGGGACGGGACGCGGTGCAGTG; miR-628-5p: ATGCTGACATATTTACTAGAGG; miR-548f-3p: AAAAACTGTAATTACTTTT; miR-23a-3p: ATCACATTGCCAGGGATTTCC which were designed by Sangon Co. Ltd. (Shanghai, China).

We determined the cycle threshold (Ct <40) to validate the major DEMs detected with high-throughput sequencing. DEMs expression detected with qPCR assays was calculated according to the 2-△△Ct algorithm. Correlation coefficient of the Ct was calculated.

**Measurement airway inflammatory factors**

The frozen sputum was thawed, followed by ultracentrifugation for 90min at 4°C in 50,000g. The sputum sol was frozen in -80°C until further detection of interleukin-1β (IL-1β), IL-8 and tumor necrosis factor-α (TNF-α) by using the Luminex multiplex assays (Biorad Co. Ltd., USA) based on the instructions of the manufacturers.

**RESULTS**

The demographic and clinical characteristics of PA and non-PA group are shown in **Table S1**. Most PA colonized patients had worse lung function (FEV1: 49.8%, P=0.006) and greater disease severity (mean BSI: 8.8, E-FACED score: 3.6, both P<0.05) than those without. The characteristics of patients with or without PA colonization in the internal validation cohort are shown in **Table S2**.

In the differential expression and Venn gram analysis between PA and non-PA colonization group, the expression levels of the overlap 10 DEMs are shown in **Table S3**, six of which were up-regulated (|log2 fold change| ranging from 0.73 to 1.72, P<0.01, FDR<0.1). In multiple linear regression analysis, five DEMs (miR-744-5p, miR-548i, miR-193b-3p, miR-1306-3p, miR-1273h-5p) did not correlate with PA colonization (P-value of the model or P-value of the β >0.05, **Table S4**). **Table S5** shows the fold difference of the five PA-associated DEMs detected with exosomal sequencing and qPCR assays between PA and non-PA group. Meanwhile, miR-92b-5p was differentially expressed in PA group compared with non-PA group (P<0.05) although miR-223-3p slightly missed the statistical significance (P=0.063). Based on the sequencing data, linear regression analysis showed miR-223-3p was correlated with the BSI (r=0.18, P<0.001, **Table S6)**. The sequencing data included raw and processed data were uploaded to GEO database (number is: GSE138820).

**Reference**

1. Guan WJ, Gao YH, Xu G, et al. [Sputum matrix metalloproteinase-8 and -9 and tissue inhibitor of metalloproteinase-1 in bronchiectasis: clinical correlates and prognostic implications.](https://www.ncbi.nlm.nih.gov/pubmed/26122009) *Respirology*. 2015; 7: 1073-1081

2. Guan WJ, Yuan JJ, Li HM, et al. Proteobacteria community compositions correlate with bronchiectasis severity. *Int J Tuberc Lung Dis*. 2018; 9: 1095-1105

3. Levänen B, Bhakta NR, Torregrosa Paredes P, et al. Altered microRNA profiles in bronchoalveolar lavage fluid exosomes in asthmatic patients. *J Allergy Clin Immunol*. 2013; 3: 894-903

4. Enderle D, Spiel A, Coticchia CM, et al. Characterization of RNA from Exosomes and Other Extracellular Vesicles Isolated by a Novel Spin Column Based Method. *PLoS One*. 2015; 8: e0136133

5. Stranska R, Gysbrechts L, Wouters J, et al. Comparison of membrane affinity-based method with size exclusion chromatography for isolation of exosome like vesicles from human plasma. *J Transl Med*. 2018; 1: 1

6. Langmead B1, Trapnell C, Pop M, et al. Ultrafast and memory-efficient alignment of short DNA sequences to the human genome. *Genome Biol*. 2009; 3: R25

7. Paraskevopoulou MD, Georgakilas G, Kostoulas N, et al. DIANA-microT web server v5.0: service integration into miRNA functional analysis workflows. *Nucleic Acids Res*. 2013; 41: W169-W173

8. Karagkouni D, Paraskevopoulou MD, Chatzopoulos S, et al. DIANA-TarBase v8: a decade-long collection of experimentally supported miRNA-gene interactions. *Nucleic Acids Res*. 2018; D1: D239-D245

9. Zhou L, Chen J, Li Z, et al. Integrated profiling of microRNAs and mRNAs: microRNAs located on Xq27.3 associate with clear cell renal cell carcinoma. *PLoS One*. 2010; 12: e15224

10. Yu G, Wang LG, Han Y, et al. clusterProfiler: an R package for comparing biological themes among gene clusters. *OMICS*. 2012; 5: 284-287

**Table S1. Clinical characteristics of bronchiectasis patients in PA and non-PA colonization group**

| **Parameter** | **PA** | **non-PA** | **P value** |
| --- | --- | --- | --- |
| **No. of subjects** | 34 | 48 | - |
| **Anthropometry** |  |  |  |
| Age (years) | 45.0±12.1 | 45.8±15.3 | 0.813 |
| Females (No., %) | 20 (58.8%) | 29 (60.4%) | 0.885 |
| Body-mass index (kg/m2) | 19.8±2.7 | 20.6±2.9 | 0.188 |
| Never-smokers (No., %) | 32 (94.1%) | 44 (91.7%) | 1.000 |
| FEV1 predicted% | 49.8±19.7 | 63.3±22.6 | **0.006** |
| **Exacerbation history** |  |  |  |
| No. of exacerbations within 1 yr | 1.5±1.1 | 1.3±1.1 | 0.377 |
| **Severity** |  |  |  |
| Bronchiectasis Severity Index | 8.8±3.8 | 5.1±3.5 | **<0.001** |
| E-FACED score | 3.6±1.5 | 1.9±1.4 | **<0.001** |
| Modified Reiff score | 10.9±4.1 | 9.0±4.0 | **0.042** |
| **Aetiology** |  |  |  |
| Idiopathic (No., %) | 10 (29.4%) | 15 (31.3%) | 0.859 |
| Post-infectious (No., %) | 15 (44.1%) | 18 (37.5%) | 0.547 |
| Others (No., %)# | 9 (26.5%) | 15 (31.3%) | 0.639 |
| **Bacterial colonization** |  |  |  |
| *Pseudomonas aeruginosa* | 34 | 0 | NA |
| *Haemophilus influenzae* | NA | 5 | NA |
| *Escherichia coli* | NA | 3 | NA |
| *Klebsiella pneumoniae* | NA | 1 | NA |
| *Proteus mirabilis* | NA | 1 | NA |
| Other pathogens* | NA | 0 | NA |

PA: *P. aeruginosa*; E-FACED: Exacerbation-FACED;

P value for comparisons between patients with PA colonization and non-PA colonization.

Others# included Kartagener syndrome (5 vs 3), asthma (0 vs 2), Immunodeficiency (1 vs 4), Gastroesophageal reflux disease-aspiration (1 vs 3), congenital airway defects (0 vs 1), diffuse panbronchiolitis (2 vs 1) and connective tissue disease (0 vs 1) between PA and non-PA group. The indicator (*) refers to other potentially pathogenic microorganisms (except for those in Table S1) as determined by colonization status in our study, which included *Streptococcus pneumoniae, Haemophilus parainfluenzae, Haemophilus parahaemolyticus, Sphingomonas sphingomonas, Enterobacter aerogenes*.

The bold values indicated that the P-value between PA and non-PA colonization group was less than 0.05.

**Table S2. Clinical characteristics of patients with or without PA colonization in internal validation cohort PCR and the whole cohort**

| **Parameter** | **The whole cohort** | **PCR cohort** | 1. **value** |
| --- | --- | --- | --- |
| **No. of subjects** | 82 | 34 |  |
| ***PA* colonization (No., %)** | 34 (41.5%) | 18 (52.9%) | 0.26 |
| **Anthropometry** |  |  |  |
| Age (years) | 45.4±14.0 | 42.4±14.8 | 0.30 |
| Females (No., %) | 49 (59.8%) | 21 (61.8%) | 0.84 |
| Body-mass index (kg/m2) | 20.2±2.8 | 19.2±2.5 | 0.06 |
| FEV1 predicted% | 57.7±22.3 | 51.8±19.3 | 0.19 |
| **Exacerbation history** |  |  |  |
| No. of exacerbations in the previous year | 1.4±1.1 | 1.6±1.1 | 0.39 |
| **Severity** |  |  |  |
| Bronchiectasis Severity Index | 6.6±4.0 | 7.8±3.9 | 0.14 |
| E-FACED score | 2.6±1.7 | 3.3±1.4 | **0.03** |
| Modified Reiff score | 9.8±4.1 | 10.8±3.8 | 0.18 |
| **Aetiology** |  |  |  |
| Idiopathic (No., %) | 25 (30.5%) | 11 (32.4%) | 0.84 |
| Post-infectious (No., %) | 33 (40.2%) | 15 (44.1%) | 0.70 |
| Others (No., %)# | 24 (29.3%) | 8 (23.5%) | 0.53 |

PA: *P. aeruginosa*; E-FACED: Exacerbation-FACED;

P-value for comparisons between patients with PA colonization and non-PA colonization in validation cohort.

Others# included Kartagener syndrome, Immunodeficiency, gastroesophageal reflux disease-aspiration and diffuse panbronchiolitis. The bold values indicated that the P-value between the whole cohort and PCR cohort was less than 0.05.

**Table S3. The list of overlap DEMs between PA and non-PA group**

| **Expression in PA group** | **miRNA** | **PA**  **(Read count)** | **non-PA**  **(Read count)** | **Log2 fold change** | **P value** | **FDR** |
| --- | --- | --- | --- | --- | --- | --- |
| **Up-regulated** | miR-628-5p | 2.39 | 0.61 | 1.72 | 1.60E-04 | 3.23E-02 |
| miR-23a-3p | 114.65 | 51.78 | 1.14 | 1.80E-04 | 3.23E-02 |
| miR-223-3p | 186.91 | 77.62 | 1.19 | 1.18E-03 | 5.42E-02 |
| miR-548f-3p | 3.15 | 1.36 | 1.08 | 5.06E-03 | 9.75E-02 |
| miR-1273h-5p | 5.82 | 2.52 | 1.03 | 3.83E-03 | 9.28E-02 |
| miR-548i | 6.82 | 3.41 | 0.92 | 1.70E-03 | 6.27E-02 |
| **Down-regulated** | miR-193b-3p | 0.36 | 1.38 | -1.65 | 2.55E-03 | 8.62E-02 |
| miR-1306-3p | 2.06 | 4.92 | -1.14 | 4.89E-03 | 9.75E-02 |
| miR-92b-5p | 24.55 | 49.56 | -0.96 | 3.84E-03 | 9.28E-02 |
| miR-744-5p | 24.53 | 40.78 | -0.73 | 1.28E-03 | 5.42E-02 |

Up-regulated: up-regulated in bronchiectasis patients; Down-regulated: down-regulated in bronchiectasis patients. Read count: the normalized expression of miRNAs calculated by TPM; FDR: false discovery ratio, which is the adjusted p-value based on the Benjamini-Hochberg algorithm. novel: mean this miRNA is not included in current databases.

Log2(fold-change) represented the fold change between bronchiectasis patients and healthy subjects and logarithmically transformed with the base of 2. All miRNAs were sorted by the absolute value of the Log2(fold-change).

**Table S4. Multiple linear regression of the five remaining DEMs and the clinical parameters of bronchiectasis**

| **miRNA ID** | **Adjusted R2** | **P-value of the model** | **Predictor variable** | **Β** | **P value of β** |
| --- | --- | --- | --- | --- | --- |
| miR-744-5p | 0.073 | 0.091 | Age | 0.02 | 0.996 |
|  |  |  | Sex | 155.17 | 0.275 |
|  |  |  | BMI | 32.53 | 0.203 |
|  |  |  | FEV1 pred% | 4.08 | 0.331 |
|  |  |  | No. of lobes affected | 126.45 | 0.117 |
|  |  |  | HRCT Reiff scores | -20.08 | 0.515 |
|  |  |  | **PA colonization** | -347.14 | **0.020** |
|  |  |  | Other bacterial colonization | -174.96 | 0.403 |
| miR-548i | 0.089 | 0.059 | Age | 0.99 | 0.202 |
|  |  |  | Sex | -13.65 | 0.535 |
|  |  |  | BMI | 3.34 | 0.398 |
|  |  |  | FEV1 pred% | -0.18 | 0.786 |
|  |  |  | No. of lobes affected | 9.67 | 0.436 |
|  |  |  | HRCT Reiff scores | -1.86 | 0.697 |
|  |  |  | **PA colonization** | 68.78 | **0.003** |
|  |  |  | Other bacterial colonization | 35.82 | 0.270 |
| miR-193b-3p | 0.057 | 0.138 | Age | 0.43 | 0.163 |
|  |  |  | Sex | 6.83 | 0.433 |
|  |  |  | BMI | -0.27 | 0.863 |
|  |  |  | FEV1 pred% | -0.06 | 0.808 |
|  |  |  | No. of lobes affected | 3.40 | 0.489 |
|  |  |  | HRCT Reiff scores | -2.35 | 0.217 |
|  |  |  | **PA colonization** | -22.58 | **0.014** |
|  |  |  | Other bacterial colonization | -18.17 | 0.159 |
| miR-1306-3p | 0.013 | 0.352 | Age | -0.54 | 0.474 |
|  |  |  | Sex | -24.77 | 0.256 |
|  |  |  | BMI | -3.15 | 0.420 |
|  |  |  | FEV1 pred% | 0.33 | 0.606 |
|  |  |  | No. of lobes affected | -6.43 | 0.600 |
|  |  |  | HRCT Reiff scores | 0.95 | 0.840 |
|  |  |  | PA colonization | -33.68 | 0.136 |
|  |  |  | Other bacterial colonization | -11.43 | 0.721 |
| miR-1273h-5p | 0.084 | 0.069 | Age | 0.70 | 0.340 |
|  |  |  | Sex | 39.29 | 0.062 |
|  |  |  | BMI | -2.03 | 0.587 |
|  |  |  | FEV1 pred% | 0.35 | 0.573 |
|  |  |  | No. of lobes affected | -14.89 | 0.208 |
|  |  |  | HRCT Reiff scores | 7.71 | 0.091 |
|  |  |  | **PA colonization** | 48.61 | **0.026** |
|  |  |  | Other bacterial colonization | 3.70 | 0.904 |

BMI: Body Mass Index; FEV1: Forced expiratory volume in one second; PA: *P*. *aeruginosa*;BSI: Bronchiectasis Severity Index; E-FACED: Exacerbation FACED. P-value that corresponded to the β value of less than 0.05 is presented in bold.

**Table S5. The fold difference of the PA-relevant DEMs detected with RNA-seq and qPCR assays between PA and non-PA group**

|  | **Log2 (Fold-change)** | |  |
| --- | --- | --- | --- |
| **DEMs** | **RNA-sequencing** | **RT-qPCR** | **P-value** |
| miR-628-5p | 1.72 | 1.67 | 0.857 |
| miR-548f-3p | 1.08 | 0.42 | 0.684 |
| miR-223-3p | 1.19 | 2.06 | **0.063** |
| miR-92b-5p | -0.96 | -2.94 | **0.031** |
| miR-23a-3p | 1.14 | 0.26 | 0.865 |

DEMs: Differential expressed miRNAs; PA: *P*. *aeruginosa*; RT-qPCR: Reverse transcription fluorescent quantitative PCR. The positive number represents that the expression of DEMs is up-expressed in PA group. The negative number means the expression of PA group is lower than non-PA group. The P value denotes the level of statistical significance of RT-qPCR assays.

**Table S6.** **Linear regression analysis between the two DEMs (miR-92b-5p and miR-223-3p) and Bronchiectasis Severity Index based on the sequencing data**

| **miRNA ID** | **Adjusted R2** | **Β** | 1. **value of β** |
| --- | --- | --- | --- |
| miR-92b-5p | 0.027 | -43.5 | 0.075 |
| **miR-223-3p** | **0.180** | **264.6** | **<0.001** |

Adjusted R2: model fit of the linear regression. Adjusted R2 is equal to correlation coefficient (r); β: the coefficient of model regression; P-value that corresponded to the β value of less than 0.05 was presented bold; Predictor variable is the Bronchiectasis Severity Index in this linear model.

**Figure legends**


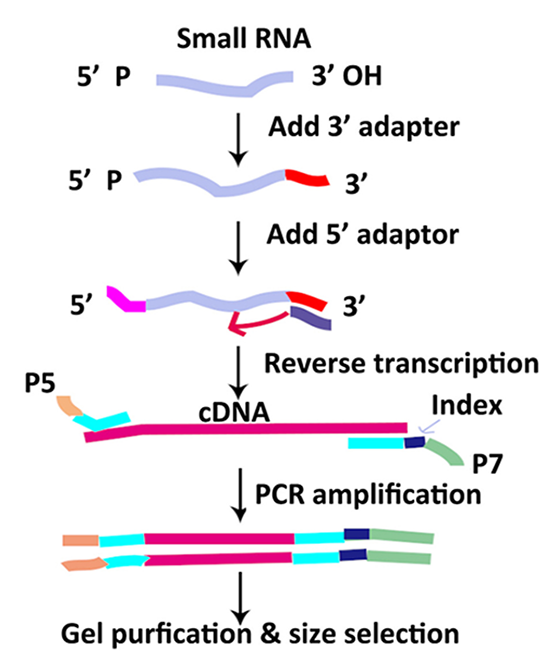


**Figure S1. The simplified flowchart of sequencing assays**

The miRNA library was generated with the NEBNext® Multiplex Small RNA Library Prep Set for Illumina® (NEB Inc., USA) in sputum exosomes. After ligation with the NEB 3' & 5' Adaptor, the reverse transcriptase primer was used to synthesize the cDNA, followed by PCR assays for amplification. Next, the PCR products (DNA fragments, length: 140~160 bp) were purified on an 8% polyacrylamide gel (100 V, 80 min). The cDNA library was constructed and its sequence length was examined by using the Aglient Bioanalyzer 2100 system (Aligent Technologies, CA, USA). The samples with effective concentration being greater than 2 nM as quantified with qPCR assays could be subject to subsequent exosomal miRNA sequencing by using the Illumina HiSeq 2500 platform.


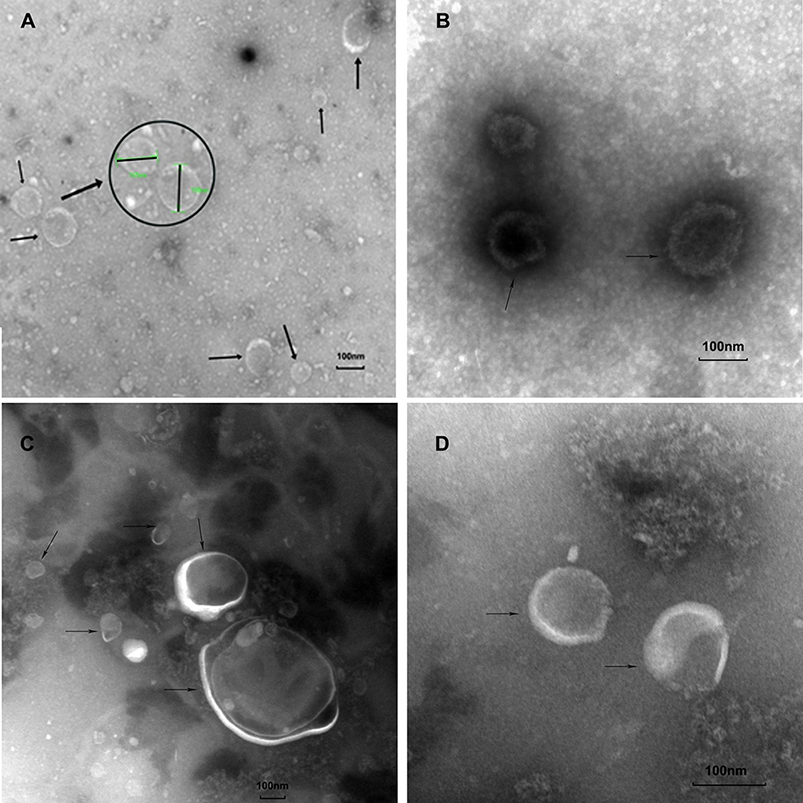


**Figure S2. The morphology of sputum exosomes as demonstrated with the transmission electron microscopy.**

We randomly selected 3 patients to identify sputum exosomes. The arrows indicated the sputum exosomes, which were extracted by commercialized extraction kits, under the transmission electron microscopy. (A~D) Sputum exosomes were obtained from Exosome Extraction Kit (Qiagen Inc, Germany). Under the negative staining of phosphotungstic acid, we identified disc-shaped vesicle structures of 50-200 nm in diameter. Occasionally larger extracellular vesicles (2C) could be identified, but the morphological features of exosomes were consistent with the previous reports [E1~3].

A. The sputum sample from a bronchiectasis patient (viscosity score: 2, purulence score: 7, disease severity: mild). B. The sputum sample from another bronchiectasis patient (viscosity score: 2, purulence score: 7, disease severity: severe). C &D. The sputum sample from the same third bronchiectasis patients (viscosity score: 3, purulence score: 7, disease severity: severe).


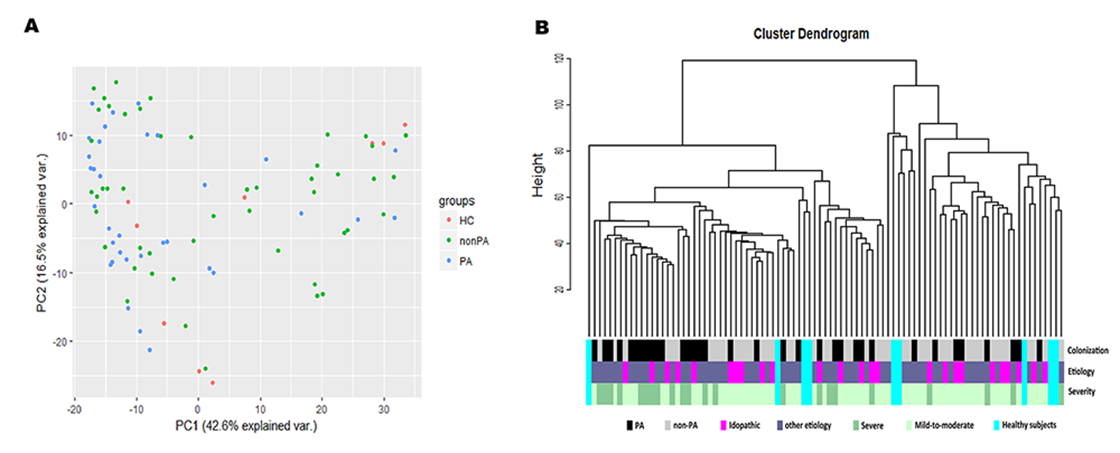


**Figure S3. Quality control analysis of the sequencing data.**

Principal component analysis and clustering analysis were applied to the global sequencing data.

(A) The principal component analysis showing the global expression patterns of all miRNAs corresponding to PA group, non-PA group and healthy subjects. The first principal component (PC1) explains for 42.6% of the total variation and the second principal component (PC2) explains for 16.5% for the total variation.

(B)The dendrogram demonstrating the distribution characteristics of samples with all miRNAs by performing hierarchical clustering with method of *Ward. D2* to calculate the distance. Each color square corresponding to the root of the dendrogram represents an individual subject.


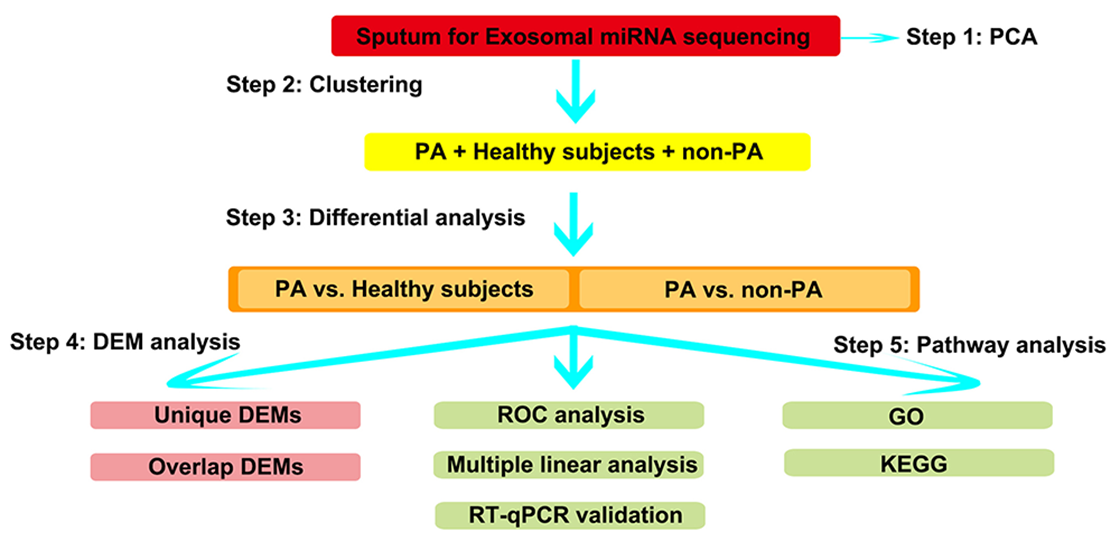


**Figure S4. The flowchart of analysis**

PCA: Principal component analysis; PA: *P. aeruginosa*; DEMs: Differentially expressed miRNAs; Overlap DEMs: Differentially expressed miRNAs in group of PA vs. Healthy subjects and PA vs. non-PA bronchiectasis patients; ROC analysis: Receiver operating characteristic curve for overlap DEMs; RT-qPCR Validation: expression of overlap DEMs validated by RT-qPCR; Pathway analysis: Pathway analysis of verified DEMs that approved by RT-qPCR; GO: Gene Ontology; KEGG: Kyoto Encyclopedia of Genes and Genomes.


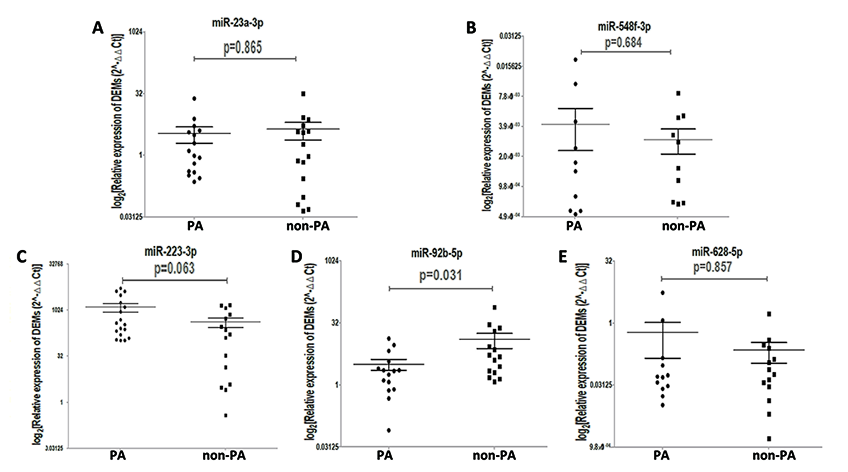


**Figure S5. The expression levels of DEMs between PA and non-PA group based on qPCR assays**

The DEMs which the C-statistic value of greater than 0.60 and correlated independently with PA colonization in the multiple linear regression analysis were subject to the further validation by performing RT-qPCR assays.

We performed qPCR assay in 34 patients who had sufficient paired sputum samples, but some patients had an insufficient amount of RNA to measure the expression level of the five DEMs. Thus, samples from 33 patients were subject to detection of miR-23a-3p, 20 in miR-548f-3p, 33 in miR-223-3p, 30 in miR-92b-5p and 26 in miR-628-5p.

qPCR: quantitative polymerase chain reaction.


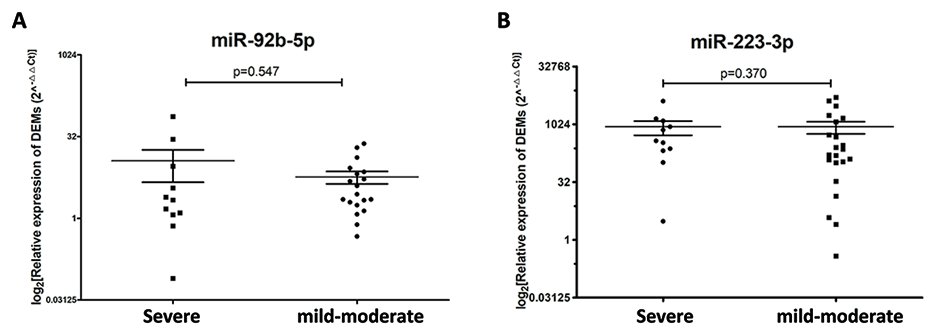


**Figure S6. The expression of miR-223-3p and miR-92b-5p in severe and mild-to-moderate based on the RT-qPCR assay**

The expression of miR-223-3p and miR-92b-5p in severe and mild-to-moderate bronchiectasis was determined by performing RT-qPCR assays.

(A) The expression of miR-92b-5p in severe and mild-to moderate patients in the RT-qPCR assay.

(B) The expression of miR-223-3p in severe and mild-to moderate patients in the RT-qPCR assay. We performed qPCR assay in 34 patients who had sufficient paired sputum samples. But some patients had an insufficient amount of RNA to measure the expression level of the five DEMs. Thus, samples from 33 patients were subject to detection of miR-223-3p and 30 in miR-92b-5p. The relative expression of DEMs was calculated according to the 2-△△Ct algorithm.

qPCR: quantitative polymerase chain reaction.


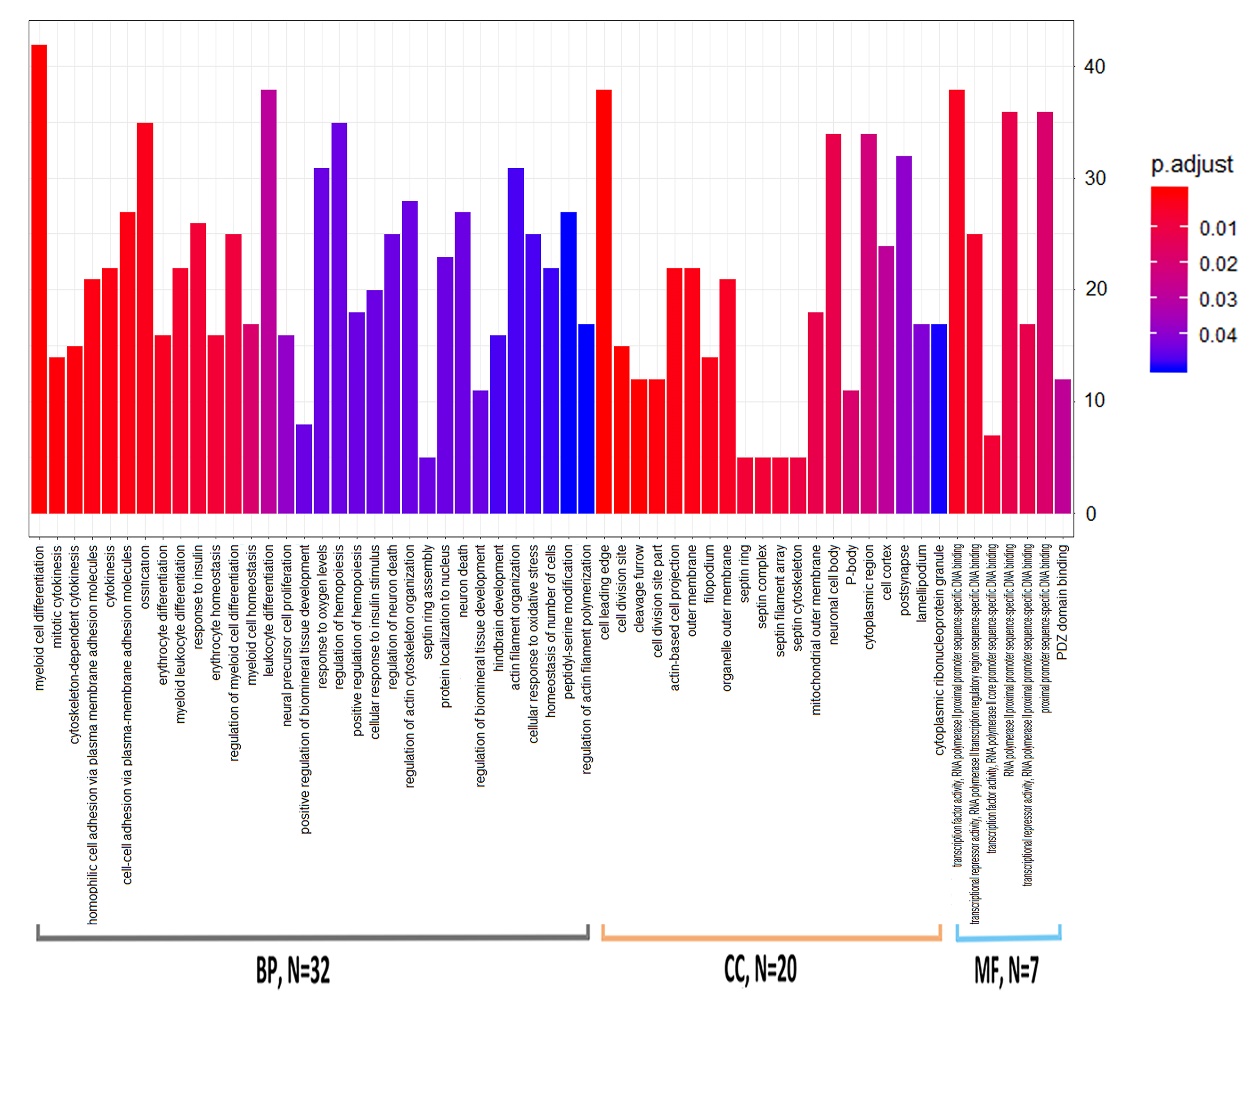


**Figure S7. The list of significant gene sets in Gene Ontology analysis**

The targeted genes of miR-92b-5p and miR-223-3p were subject to Gene Ontology analysis by using clusterProfiler package. Biological functions with the adjusted P value (Padj) of less than 0.05 were considered as statistically significant. The P value was adjusted based on the Benjamini-Hochberg algorithm. We identified 59 terms of the biological annotations. The scale of the vertical axis represents the number of the target genes in certain terms.

BP: biological process; CC: cellular component; MF: molecular function.


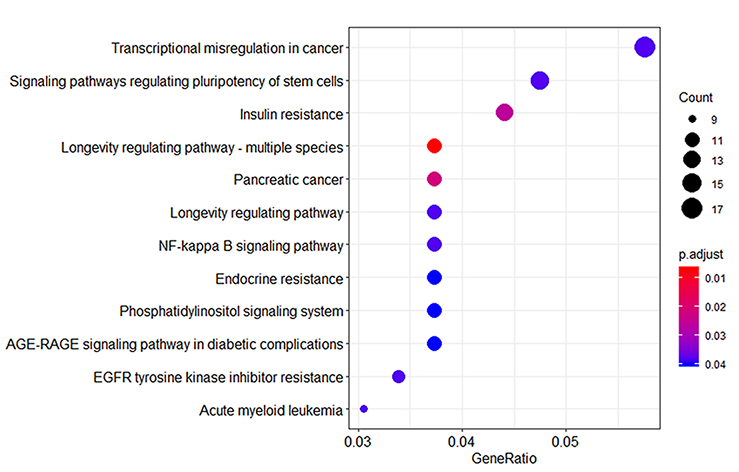


**Figure S8. The list of the enriched signaling pathways in KEGG analysis**

The target genes regulated by miR-92b-5p and miR-223-3p were predicted with the KEGG analysis by using the *clusterProfiler* package. The biological signaling pathways with the adjusted P value (Padj) of less than 0.05 were considered as statistically significant. The P value was adjusted based on the Benjamini-Hochberg algorithm. We identified 12 biological signaling pathways, five of which were excluded from our final analysis because they were significantly associated with cancer or growth of stem cells. The ordinate is the pathway term for all enrichment.

GeneRatio: The larger value refers to the greater enrichment, GeneRatio equals to the number of differentially expressed genes located under the pathway term/number of all the annotated genes located under the pathway term;

Count: The size of the circle dot represents the number of differential genes under the pathway term, the larger the circle means the more number of genes;

p.adjust: The P value after adjusted by Benjamini-Hochberg algorithm, ranging from 0.01 to 0.04 (representing with different color intensity).
